# Supplementary material
Source: MDPI journal article supplement (https://www.mdpi.com/2227-7102/11/8/424)
Supplement: s1 [file s1 › education-1313108-supplementary.pdf]

**SUPPLEMENTAL ONLINE FILE*****Education Sciences*****Context Matters in Gifted Education****Bibliography of Related Reading Authored or Co-authored by Bruce M. Shore**

Section headings in this bibliography correspond to those in the journal article.

Items are listed once but several are relevant to more than one section.

**Theory Context Matters****Contributions to the Context of Theories about the Nature of Abilities**

Austin, L. B., & Shore, B. M. (1993). Concept mapping of high and average achieving students, and experts. *European Journal for High Ability* [now *High Ability Studies*], 4(2), 180-195. <https://doi.org/10.1080/0937445930040207>

Barfurth, M. A., Ritchie, K. C., Irving, J. A., & Shore, B. M. (2009). A metacognitive portrait of gifted learners. In L. V. Shavinina (Ed.), *International handbook on giftedness* (pp. 397-417). Springer.

Birlean, C., Birlean, E. M., & Shore, B. M. (in press). Problem-solving characteristics in gifted and advanced learners. In E. M. Miller, M. S. Matthews, & D. D. Dixon (Eds.), *The development of the high ability child: Psychological perspectives on giftedness*. Routledge (originally Prufrock Press).

Birlean, C., & Shore, B. M. (2018). Cognitive development of giftedness and talents: From theory to practice. In J. L. Roberts, T. F. Inman, & J. H. Robins (Eds.), *Introduction to gifted education* (pp. 95-118). Routledge (originally Prufrock Press).

- Bowen, S., Shore, B. M., & Cartwright, G. F. (1992). Do gifted children use computers differently?: A view from "The Factory." *Gifted Education International*, 8(3), 151-154.  
<https://doi.org/10.1177/026142949200800306>
- Coleman, E., & Shore, B. M. (1991). Problem-solving processes of high and average performers in physics. *Journal for the Education of the Gifted*, 14(4), 366-379.  
<https://doi.org/10.1177/016235329101400403>
- Dover, A. C., & Shore, B. M. (1991). Giftedness and flexibility on a mathematical set-breaking task. *Gifted Child Quarterly*, 35(2), 99-105.  
<https://doi.org/10.1177/001698629103500209>
- Friedman, R. C., & Shore, B. M. (Eds.). (2000). *Talents unfolding: Cognition and development*. American Psychological Association. <https://doi.org/10.1037/10373-000>
- Kaizer, C., & Shore, B. M. (1995). Strategy flexibility in more and less competent students on mathematical word problems. *Creativity Research Journal*, 8(1), 113-118.  
[https://doi.org/10.1207/s15326934crj0801\\_6](https://doi.org/10.1207/s15326934crj0801_6)
- Lajoie, S. P., & Shore, B. M. (1986). Intelligence: The speed and accuracy tradeoff in high aptitude individuals. *Journal for the Education of the Gifted*, 9(2), 85-104.  
<https://doi.org/10.1177/016235328600900201>
- Linn, B., & Shore, B. M. (2008). Critical thinking. In J. A. Plucker & C. M. Callahan (Eds.), *Critical issues and practices in gifted education: What the research says* (pp. 155-165). Routledge (originally Prufrock Press).
- Maniatis, E., Cartwright, G. F., & Shore, B. M. (1998). Giftedness and complexity in a self-directed computer-based task. *Gifted and Talented International*, 13(2), 83-89.  
<https://doi.org/10.1080/15332276.1998.11672891>

- Martini, R., & Shore, B. M. (2008). Pointing to parallels in ability-related differences in the use of metacognition in academic and psychomotor tasks. *Learning and Individual Differences, 18*(2), 237-247. <https://doi.org/10.1016/j.lindif.2007.08.004>
- Martini, R., Wall, A. E., & Shore, B. M. (2004). Metacognitive processes underlying psychomotor performance in children with differing psychomotor abilities. *Adapted Physical Activity Quarterly, 21*(3), 248-268. <https://doi.org/10.1123/apaq.21.3.248>
- Pelletier, S., & Shore, B. M. (2003). The gifted learner, the novice, and the expert: Sharpening emerging views of giftedness. In D. C. Ambrose, L. Cohen, & A. J. Tannenbaum (Eds.), *Creative intelligence: Toward theoretic integration* (pp. 237-281). Hampton Press.
- Shore, B. M. (1982). Developing a framework for the study of learning style in high-level learning. In J. Keefe (Ed.), *Student learning styles and brain behavior: Programs, instrumentation, research* (pp. 372-400). National Association of Secondary School Principals.
- Shore, B. M. (1986). Cognition and giftedness: New research directions. *Gifted Child Quarterly, 30*(1), 24-27. <https://doi.org/10.1177/001698628603000105>
- Shore, B. M. (1987). [Review of the book *Conceptions of giftedness* by R. J. Sternberg & J. E. Davidson (Eds.).] *Journal for the Education of the Gifted, 10*(4), 333-337. <https://doi.org/10.1177/016235328701000409c>
- Shore, B. M. (1996). Strategy flexibility: On Jaušovec's *Flexible thinking: An explanation for differences in ability* [Review of the book *Flexible thinking: An explanation for differences in ability*, by N. Jaušovec]. *Creativity Research Journal, 9*(2-3), 287-288. <https://doi.org/10.1080/10400419.1996.9651183>
- Shore, B. M., & Dover, A. C. (1987). Metacognition, intelligence and giftedness. *Gifted Child*

- Quarterly*, 31(1), 37-39. <https://doi.org/10.1177/001698628703100108>
- Shore, B. M. (2000). Metacognition and flexibility: Qualitative differences in how the gifted think. In R. C. Friedman & B. M. Shore (Eds.), *Talents unfolding: Cognition and development* (pp. 167-187). American Psychological Association.  
<https://doi.org/10.1037/10373-008>
- Shore, B. M., & Carey, S. M. (1984). Verbal ability and spatial task. *Perceptual and Motor Skills*, 59(1), 255-259. <https://doi.org/10.2466/pms.1984.59.1.255>
- Shore, B. M., Coleman, E. B., & Moss, E. (1992). Cognitive psychology and the use of protocols in the understanding of giftedness and high level thinking. In F. J. Mönks & W. Peters (Eds.), *Talent for the future: Social and personality development of gifted children* (pp. 259-263). Van Gorcum.
- Shore, B. M., Hymovitch, J., & Lajoie, S. P. (1982). Processing differences in the relation between ability and field-independence. *Psychological Reports*, 50(2), 391-395.  
<https://doi.org/10.2466/pr0.1982.50.2.391>
- Shore, B. M., & Irving, J. A. (2005). Inquiry as a pedagogical link between expertise and giftedness: The High Ability and Inquiry Research Group at McGill University. *Gifted and Talented International*, 20(1), 37-40.  
<https://doi.org/10.1080/15332276.2005.11673056>
- Shore, B. M., & Kanevsky, L. S. (1993). Thinking processes: Being and becoming gifted. In K. A. Heller, F. J. Mönks, & A. H. Passow (Eds.), *International handbook of research and development of giftedness and talent* (pp. 131-145). Pergamon.
- Shore, B. M., Koller, M. B., & Dover, A. C. (1994). More from the water jars: Revisiting a cognitive task on which some gifted children's performance is exceeded. *Gifted Child*

- Quarterly*, 38(4), 179-183. <https://doi.org/10.1177/001698629403800405>
- Shore, B. M., & Lazar, L. (1996). IQ-related differences in time allocation during problem solving. *Psychological Reports*, 78(3), 848-849.  
<https://doi.org/10.2466/pr0.1996.78.3.848>
- Shore, B. M., Rejskind, F. G., & Kanevsky, L. S. (2003). Cognitive research on giftedness: A window on creativity. In D. C. Ambrose, L. Cohen, & A. J. Tannenbaum (Eds.), *Creative intelligence: Toward theoretic integration* (pp. 181-210). Hampton Press.
- Syer, C. A., Jad-Moussa, R., Pelletier, S., & Shore, B. M. (2003). Adaptive-creative versus routine-reproductive expertise in hypermedia design: An exploratory study. *Cognition, Technology and Work*, 5(2), 94-106. <https://doi.org/10.1007/s10111-002-0106-7>
- Tabatabai, D., & Shore, B. M. (2005). How experts and novices search the Web. *Library and Information Science Research*, 27(2), 222-248. <https://doi.org/10.1016/j.lisr.2005.01.005>
- Tarshis, E., & Shore, B. M. (1991). Differences in perspective taking between high and above average IQ preschool children. *European Journal for High Ability* [now *High Ability Studies*], 2(2), 201-211. <https://doi.org/10.1080/0937445910020209>
- Walker, C. L., & Shore, B. M. (2011). Theory of mind and giftedness: New connections. *Journal for the Education of the Gifted*, 34(4), 644-668.  
<https://doi.org/10.1177/016235321103400406>
- Walker, C. L., & Shore, B. M. (2012). Five gifted ways to lose your creative intelligence. In D. Ambrose & R. J. Sternberg (Eds.), *How dogmatic beliefs harm creativity and higher-level thinking* (pp. 171-184). Routledge. <https://doi.org/10.4324/9780203813096>

### **Contributions to the Context of Theories about Instruction**

- Aulls, M. W., & Shore, B. M. (2008). *Inquiry in education (Vol. I): The conceptual foundations*

*for research as a curricular imperative*. Routledge (originally Erlbaum).

Barfurth, M. A., & Shore, B. M. (2008). White water during inquiry learning: Understanding the place of disagreements in the process of collaboration. In B. M. Shore, M. W. Aulls, & M. A. B. Delcourt (Eds.), *Inquiry in education (vol. II): Overcoming barriers to successful implementation* (pp. 149-164). Routledge (originally Erlbaum).

Borovay, L. A., Shore, B. M., Caccese, C., Yang, E., & Hua, O. (2019). Flow, achievement level, and inquiry-based learning. *Journal of Advanced Academics*, 30(1), 74-106.  
<https://doi.org/10.1177/1932202X18809659>

Chichekian, T., Savard, A., & Shore, B. M. (2011). The languages of inquiry: An English-French lexicon of inquiry terminology in education. *LEARNing Landscapes*, 4(2), 93-109.  
<http://www.learninglandscapes.ca/images/documents/ll-no8/tchichekian.pdf>

Chichekian, T., & Shore, B. M. (2014a). Cognitive characteristics of the gifted: Reconceptualized in the context of inquiry learning and teaching. In J. A. Plucker & C. M. Callahan (Eds.), *Critical issues and practices in gifted education: What the research says* (2nd ed., pp. 119-132). Routledge (originally Prufrock Press).  
ISBN: 9781618210951

Chichekian, T., & Shore, B. M. (2014b). The International Baccalaureate: Contributing to the use of inquiry in higher education teaching and learning. In J. M. Carfora & P. Blessinger (Eds.), *Inquiry-based learning for faculty and institutional development: A conceptual and practical resource for educators* (pp. 73-97). Emerald.  
<https://doi.org/10.1108/S2055-364120140000001006>

Chichekian, T., & Shore, B. M. (2017). Hold firm: Gifted learners value standing one's ground in disagreements with a friend. *Journal for the Education of the Gifted*, 40(2), 152-167.

<https://doi.org/10.1177/0162353217701020>

French, L. R., & Shore, B. M. (2009). A reconsideration of the widely held conviction that gifted students prefer to work alone. In B. Hymer, T. Balchin, & D. Matthews (Eds.), *The Routledge international companion to gifted education* (pp. 176-182 plus references). Routledge. (All references on pp. 325-366.)

French, L. R., Walker, C. L., & Shore, B. M. (2011). Do gifted students really prefer to work alone? *Roeper Review*, 33(3), 145-159. <https://doi.org/10.1080/02783193.2011.580497>

Gyles, P. D. T., Shore, B. M., & Schneider, B. H. (2009, Spring). Big ships, small ships, friendships and competition: Things to consider. *Teaching for High Potential*, pp. 3, 19. [https://www.researchgate.net/publication/299294663\\_Big\\_ships\\_small\\_ships\\_friendships\\_and\\_competition\\_Things\\_to\\_consider](https://www.researchgate.net/publication/299294663_Big_ships_small_ships_friendships_and_competition_Things_to_consider)

hannah, c. l., & Shore, B. M. (1995). Metacognition and high intellectual ability: Insights from the study of learning-disabled gifted students. *Gifted Child Quarterly*, 39(2), 95-109. <https://doi.org/10.1177/001698629503900206>

hannah, c. l., & Shore, B. M. (2008). Twice exceptional students' use of metacognitive skills on a comprehension-monitoring task. *Gifted Child Quarterly*, 52(1), 3-18. <https://doi.org/10.1177.0016986207311156>

Lajoie, S. P., & Shore, B. M. (1981). Three myths? The over-representation of the gifted among drop-outs, delinquents, and suicides. *Gifted Child Quarterly*, 25(3), 138-143. <https://doi.org/10.1177/001698628102500312>

Lajoie, S. P., & Shore, B. M. (1987). Impulsivity, reflectivity, and high IQ. *Gifted Education International*, 4(3), 139-141. <https://doi.org/10.1177/026142948700400304>

Masden, C. A., Leung, O. N., Shore, B. M., Schneider, B. H., & Udvari, S. J. (2015). Social-

- perspective coordination in gifted adolescent friendships. *High Ability Studies*, 26(1), 3-38. <https://doi.org/10.1080/13598139.2015.1028613>
- Oppong, E., Shore, B. M., & Muis, K. R. (2019). Clarifying the connections among giftedness, metacognition, self-regulation, and self-regulated learning: Implications for theory and practice. *Gifted Child Quarterly*, 63(2), 102-119. <https://doi.org/10.1177/0016986218814008>
- Oppong-Nuako, J., Shore, B. M., Saunders-Stewart, K. S., & Gyles, P. D. T. (2015). Using brief teacher interviews to assess the extent of inquiry in classrooms. *Journal of Advanced Academics*, 26(3), 197-226. Retrieved from [joa.sagepub.com](http://joa.sagepub.com), <https://doi.org/10.1177/1932202X15588368>
- Parthimos, M., & Shore, B. M. (1986). Psychopathology, suicide, and giftedness. In J. J. Gallagher & R. D. Courtwright (Eds.), *Annotated bibliographies of gifted education* (pp. 117-124). Trillium Press.
- Ritchie, K. C., Shore, B. M., LaBanca, F., & Newman, A. (2011). The impact of emotions on divergent thinking processes: A consideration for inquiry-oriented teachers. *LEARNing Landscapes*, 5(1), 211-225. <http://www.learninglandscapes.ca/images/documents/ll-no9/kcritchie.pdf>
- Rysiew, K. J., Shore, B. M., & Carson, A. D. (1994). Multipotentiality and overchoice syndrome: Clarifying common usage. *Gifted and Talented International*, 9(2), 41-46. <https://doi.org/10.1080/15332276.1994.11672792>
- Rysiew, K. J., Shore, B. M., & Leeb, R. T. (1999). Multipotentiality, giftedness, and career choice: A review. *Journal of Counseling and Development*, 77(4), 423-430. <https://doi.org/10.1002/j.1556-6676.1999.tb02469.x>

- Sajjadi, S. H. (with Rejskind, F. G., & Shore, B. M.). (2001). Is multipotentiality a problem or not? A new look at the data. *High Ability Studies*, 12(1), 27-43.  
<https://doi.org/10.1080/13598130120058671>
- Saunders-Stewart, K. S., Gyles, P. D. T., Shore, B. M., & Bracewell, R. J. (2015). Student outcomes in inquiry: Students' perspectives. *Learning Environments Research*, 18(2), 289-311. <https://doi.org/10.1007/s10984-015-9185-2>
- Schapiro, M., Schneider, B. H., Shore, B. M., Margison, J. A., & Udvari, S. J. (2009). Competitive goal orientations, quality, and stability and friendship in gifted and other adolescents' friendships: A test of Sullivan's theory about the harm caused by rivalry. *Gifted Child Quarterly*, 53(2), 71-88. <https://doi.org/10.1177/0016986208330566>
- Shore, B. M. (2010, October). Giftedness, inquiry, and expertise: Leading with new connections. In *Multicultural and gifted education in Canada: Insights for strategies and policies of Korean education--Proceedings of the biennial meeting of the Korean Association for Canadian Studies* (pp. 52-68). Korean Association for Canadian Studies and Chung-Ang University College of Education and Research Institute of Korean Education.
- Shore, B. M. (2017). Foreword. In G. Kidman & N. Casinader, *Inquiry-based teaching and learning across disciplines: Comparative theory and practice in schools* (pp. vii-ix). Palgrave Macmillan.
- Shore, B. M., Aulls, M. W., & Delcourt, M. A. B. (Eds.). (2008). *Inquiry in education (Vol. II): Overcoming barriers to successful implementation*. Routledge (originally Erlbaum).
- Shore, B. M., Aulls, M. W., Tabatabai, D., & Kaur Magon, J. (2020). *I is for inquiry: An ABC of inquiry instruction for elementary teachers and schools*. Routledge (originally Prufrock Press).

- Shore, B. M., Birlean, C., Walker, C. L., Ritchie, K. C., LaBanca, F., & Aulls, M. W. (2009). Inquiry literacy: A proposal for a neologism. *LEARNIng Landscapes*, 3(1), 139-155.  
<http://www.learninglandscapes.ca/images/documents/ll-no5/bmshore.pdf>
- Shore, B. M., Chichekian, T., Gyles, P. D. T., & Walker, C. L. (2019). Friendships of gifted children and youth: Updated insights and understanding. In B. Wallace, D. A. Sisk, & J. Senior (Eds.), *The SAGE handbook of gifted and talented education* (pp. 184-195). SAGE. <https://doi.org/10.4135/9781526463074.n17>
- Shore, B. M., Chichekian, T., Syer, C. A., Aulls, M. W., & Frederiksen, C. H. (2012). Planning, enactment, and reflection in inquiry-based learning: Validating the McGill Strategic Demands of Inquiry Questionnaire. *International Journal of Science and Mathematics Education*, 10, 315-337. <https://doi.org/10.1007/s10763-011-9301-4>
- Walker, C. L., & Shore, B. M. (2015a). Myth busting: Do high-performing students prefer working alone? *Gifted and Talented International*, 30(1-2), 85-105.  
<https://doi.org/10.1080/15332276.2015.1137461>
- Walker, C. L., & Shore, B. M. (2015b). Understanding classroom roles in inquiry education: Linking role theory and social constructivism to the concept of role diversification. *SAGE Open*, 5(4), 1-13. <https://doi.org/10.1177/2158244015607584>
- Walker, C. L., Shore, B. M., & French, L. R. (2011). A theoretical context for examining students' preferences across ability levels for learning alone or in groups. *High Ability Studies*, 22(1), 119-141. <https://doi.org/10.1080/13598139.2011.576082>
- Walker, C. L., Shore, B. M., & Tabatabai, D. (2013). Eye of the beholder: Investigating the interplay between inquiry role diversification and social perspective taking. *International Journal of Educational Psychology*, 2(2), 144-192. <https://doi.org/10.4471/ijep.2013.23>

Walker, C. L., Shore, B. M., & Tabatabai, D. (2021). On the trail of authentic collaboration over extended time in inquiry classrooms: Following the footprints of role diversification as indicators that inquiry occurred. Advance online publication. *Scandinavian Journal of Educational Research*. <https://doi.org/10.1080/00313831/2021.1940272>

### **Practice Context Matters**

#### **Identifying Best Practices**

Robinson, A., & Shore, B. M. (2009). Best practices in gifted education. In B. A. Kerr (Ed.), *Encyclopedia of giftedness, creativity, and talent (Vol. 1)* (pp. 89-92). SAGE.

Robinson, A., Shore, B. M., & Enersen, D. L. (2006). *Best practices in gifted education: An evidence-based guide*. Routledge (originally Prufrock Press) and the National Association for Gifted Children (USA).

Shore, B. M., Cornell, D. C., Robinson, A., & Ward, V. S. (1991). *Recommended practices in gifted education: A critical analysis*. Teachers College Press.

#### **Specific Pedagogical Practices**

Casey, K. M. A., & Shore, B. M. (2000). Mentors' contributions to adolescents' affective, social, and vocational development. *Roeper Review*, 22(4), 227-230.

Casey, K. M. A., & Shore, B. M. (2002). Mentors' contributions to gifted adolescents' development. *The Prevention Researcher*, 9(1), 12-13.  
<https://doi.org/10.1080/02783190009554043>

Cera Guy, J. N. M. T., Williams, J. M., & Shore, B. M. (2019). High- and otherwise-achieving students' expectations of classroom group work: An exploratory empirical study. *Roeper Review*, 41(3), 166-184. <https://doi.org/10.1080/02783193.2019.1622166>

Litvack, M. S., Ritchie, K. C., & Shore, B. M. (2011). High- and average-achieving students'

- perceptions of disabilities and of students with disabilities in inclusive classrooms.  
*Exceptional Children*, 77(4), 474-487. <https://doi.org/10.1177/001440291107700406>
- Morisano, D., & Shore, B. M. (2010). Can personal goal setting tap the potential of the gifted underachiever? *Roeper Review*, 32(4), 249-258.  
<https://doi.org/10.1080/02783193.2010.508156>
- Morisano, D., Hirsh, J. B., Peterson, J. B., Pihl, R. O., & Shore, B. M. (2010). Setting, elaborating, and reflecting on personal goals improves academic performance. *Journal of Applied Psychology*, 95(2), 255-264. <https://doi.org/10.1037/a0018478>
- Saunders-Stewart, K. S., Walker, C. L., & Shore, B. M. (2013). How do parents and teachers of gifted students perceive group work in classrooms? *Gifted and Talented International*, 28(1-2), 99-106. <https://doi.org/10.1080/15332276.2013.11678406>
- Shore, B. M. (1986). Comment on K. Davidson, The case against formal identification. *The Gifted Child Today*, 9(6), 7-11 and 49. <https://doi.org/10.1177/107621758600900602>
- Shore, B. M. (2006). Yogi Berra's Chevy truck: A report card on the state of research in the field of gifted education. *Gifted Child Quarterly*, 50(4), 351-353.  
<https://doi.org/10.1177/001698620605000409>
- Shore, B. M., Delcourt, M. A. B., Syer, C. A., & Schapiro, M. (2008). The phantom of the science fair. In B. M. Shore, M. W. Aulls, & M. A. B. Delcourt (Eds.), *Inquiry in education (Vol. II): Overcoming barriers to successful implementation* (pp. 83-118). Routledge (originally Erlbaum).
- Shore, B. M., & Tsiamis, A. (1985). Research support for less formal identification of giftedness. *Gifted Children Monthly*, 6(8), 5.
- Shore, B. M., & Tsiamis, A. (1986). Identification by provision: Limited field test of a radical

- alternative for identifying gifted students. In K. A. Heller & J. F. Feldhusen (Eds.), *Identifying and nurturing the gifted: An international perspective* (pp. 93-102). Huber.
- Syer, C. A., & Shore, B. M. (2001). Science fairs: Sources of help for students and the prevalence of cheating. *School Science and Mathematics*, 101(4), 206-220.  
<https://doi.org/10.1111/j.1949-8594.2001.tb18023.x>
- Williams, J. M., Cera Guy, J. N. M. T., & Shore, B. M. (2019). High-achieving students' expectations about what happens in classroom group work: A review of contributing research. *Roeper Review*, 41(3), 156-165.  
<https://doi.org/10.1080/02783193.2019.1622165>
- General-Education Context Matters**
- Clark, C., & Shore, B. M. (2004). *Educating students with high ability* (rev. ed.). UNESCO.  
<http://unesdoc.unesco.org/images/0013/001383/138328e.pdf>
- Gagné, F., & Shore, B. M. (1986). *L'entrée précoce à l'école pour les enfants doués ou talentueux*. Mémoire soumis au Ministre de l'éducation du Québec par Douance Québec. Also available in English as *Early entry to school for gifted and talented children*. A position paper presented to the Minister of Education of Quebec by the association Giftedness Quebec. doi:10.13140/RG.2.1.2653.0966
- Hua, O., & Shore, B. M. (2009). Patterns of curriculum development and provision for gifted students in Canada. In C. J. Maker & S. W. Schiever (Eds.), *Curriculum development and teaching strategies for gifted learners* (3rd ed.) (pp. 335-343). Pro-Ed.
- Irving, J. A., Oppong, E., & Shore, B. M. (2016). Alignment of a high-ranked PISA mathematics curriculum and the *Parallel Curriculum* for gifted students: Is a high PISA mathematics ranking indicative of curricular suitability for gifted learners? *Gifted and Talented*

- International*, 31(2), 114-131. <https://doi.org/10.1080/15332276.2017.1356657>
- Karovitch, S. K., Shore, B. M., & Delcourt, M. A. B. (1996). Gifted and nongifted students' reasons for leaving French-immersion programs. *Gifted and Talented International*, 11(1), 30-33. <https://doi.org/10.1080/15332276.1996.11672838>
- Kaur Magon, J., & Shore, B. M. (2021). *Asynchronous posting or reading both reflect community of inquiry*. Manuscript submitted for publication. Department of Education, University of Oxford, and Department of Educational and Counselling Psychology, McGill University.
- Maier, N. E. A., & Shore, B. M. (1989). Begabtenausbildung in Kanada: Individuelle Initiative und institutionelle Mitwirkung (Education of the gifted in Canada: Individual initiative and institutional participation). In H.-G. Melhorn & K. Urban (Eds.), *Hochbegabtenförderung international (Education of the gifted and talented—international tendencies)* (pp. 74-83). VEB Deutscher Verlag der Wissenschaften. [https://www.researchgate.net/profile/Bruce\\_Shore2/publication/299290659\\_Begabtenausbildung\\_in\\_Kanada\\_Individuelle\\_Initiative\\_und\\_institutionelle\\_Mitwirkung\\_Education\\_of\\_the\\_gifted\\_in\\_Canada\\_Individual\\_initiative\\_and\\_institutional\\_participation/links/56f46f7208ae7c1fda2d76e2/Begabtenausbildung-in-Kanada-Individuelle-Initiative-und-institutionelle-Mitwirkung-Education-of-the-gifted-in-Canada-Individual-initiative-and-institutional-participation.pdf](https://www.researchgate.net/profile/Bruce_Shore2/publication/299290659_Begabtenausbildung_in_Kanada_Individuelle_Initiative_und_institutionelle_Mitwirkung_Education_of_the_gifted_in_Canada_Individual_initiative_and_institutional_participation/links/56f46f7208ae7c1fda2d76e2/Begabtenausbildung-in-Kanada-Individuelle-Initiative-und-institutionelle-Mitwirkung-Education-of-the-gifted-in-Canada-Individual-initiative-and-institutional-participation.pdf)
- Schermerhorn, S. M., Goldschmid, M. L., & Shore, B. M. (1975). Learning basic principles of probability in student dyads: A cross-age comparison. *Journal of Educational Psychology*, 67(4), 551-557. <http://dx.doi.org/10.1037/h0077001>
- Schermerhorn, S. M., Goldschmid, M. L., & Shore, B. M. (1976). Peer-teaching in the

- classroom: Rationale and feasibility. *Improving Human Performance Quarterly*, 5(1), 27-34.
- Shore, B. M. (1981). Gifted children's feelings about school and themselves in open and open-area classes. *Journal for the Education of the Gifted*, 4(2), 112-121.  
<https://doi.org/10.1177/016235328100400207>
- Shore, B. M. (1981). What principals and commissioners can do for free for the gifted. *Special Education in Canada*, 55(4), 4-5.  
[https://www.researchgate.net/publication/299305562\\_What\\_principals\\_and\\_commissioners\\_can\\_do\\_for\\_free\\_for\\_the\\_gifted](https://www.researchgate.net/publication/299305562_What_principals_and_commissioners_can_do_for_free_for_the_gifted)
- Shore, B. M. (1982). *The education of gifted children in Quebec in the short and medium term*. Commissioned report to the Ministry of Education of Quebec. (Listed in the ERIC system, Level 1, and abstracted in *Resources in Education* and *Exceptional Child Education Resources*.) <https://doi.org/10.13140/RG.2.1.3439.5283>
- Shore, B. M. (2010). Giftedness is not what it used to be, school is not what it used to be, their future, and why psychologists in education should care. *Canadian Journal of School Psychology*, 25(2), 151-199. <https://doi.org/10.1177/0829573509356896>
- Shore, B. M. (2011). Gifted-program provision is at least as serious a challenge as identification. Comment on F. Gagné, Academic talent development and the equity issue in gifted education. *Talent Development and Excellence*, 3(1), 97-99.  
<http://iratde.com/index.php/jtde/article/view/54/52>
- Shore, B. M. (2015). Are the problems of gifted education really about discipline myopia? Comment on D. Ambrose, Borrowing insights from other disciplines to strengthen the conceptual foundations for gifted education. *International Journal of Talent Development*

- and Creativity*, 3(2), 119-124. [https://www.pef.uni-lj.si/fileadmin/Datoteke/CRSN/branje/IJTDC\\_3\\_2\\_\\_December\\_2015\\_updated\\_.pdf](https://www.pef.uni-lj.si/fileadmin/Datoteke/CRSN/branje/IJTDC_3_2__December_2015_updated_.pdf)
- Shore, B. M., Bramer, D. H. H., French, L. R., & Assouline, S. L. G., (2006). What can school psychologists do for gifted students? *Understanding our Gifted*, 18(2), 18-20.  
<http://www.ourgifted.com/Journals/UOG18-2.pdf>
- Shore, B. M., & Delcourt, M. A. B. (1996). Effective curricular and program practices in gifted education and their interface with general education. *Journal for the Education of the Gifted*, 20(2), 138-154. <https://doi.org/10.1177/016235329602000203>
- Shore, B. M., Gagné, F., Larivée, S., Tali, R. H., & Tremblay, R. E. (Eds.). (1983). *Face to face with giftedness* (Selected proceedings of the Fourth World Conference in Gifted and Talented Children, Montreal, 1981). Trillium Press.
- Shore, B. M., & Gube, M. (2018). A historical overview of instructional theory and practice in the United States and Canada: The double Slinky phenomenon in gifted and general education. In S. I. Pfeiffer, E. Shaunessy-Dedrick, & M. Foley-Nicpon (Eds.), *APA handbook of giftedness and talent* (pp. 39-54). American Psychological Association.  
<https://doi.org/10.1037/0000038-003>
- Shore, B. M., Kanevsky, L. S., & Rejskind, F. G. (1991). Learning and the needs of gifted students. In R. H. Short, L. L. Stewin, & S. J. H. McCann (Eds.), *Educational psychology: Canadian perspectives* (pp. 372-400). Copp Clark Pitman.
- Shore, B. M., Rejskind, F. G., & Kanevsky, L. S. (1992). Gifted and general education in Canada: Finding a shared agenda. *Exceptionality Education Canada*, 2(1-2), 77-93.  
[https://www.researchgate.net/publication/299301269\\_Gifted\\_and\\_general\\_education\\_in\\_Canada\\_Finding\\_a\\_shared\\_agenda](https://www.researchgate.net/publication/299301269_Gifted_and_general_education_in_Canada_Finding_a_shared_agenda)

**Additional Publications Relevant to Gifted Education  
in Relation to Higher (including Teacher) Education**

- Aulls, M. W., Kaur Magon, J., & Shore, B. M. (2015). The distinction between inquiry-based instruction and non-inquiry-based instruction in higher education: A case study of what happens as inquiry in 16 education courses in three universities. *Teaching and Teacher Education, 51*, 147-161. <https://doi.org/10.1016/j.tate.2015.06.011>
- Aulls, M. W., Kaur Magon, J., & Shore, B. M. (2021). *Active-learning practices in undergraduate science instruction: A multiple-case study of variability and instructional context*. Manuscript submitted for publication. Department of Educational and Counselling Psychology, McGill University.
- Aulls, M. W., Tabatabai, D., & Shore, B. M. (2016). What makes inquiry stick? The quality of preservice teachers' understanding of inquiry. *SAGE Open, 6*(4), 1-12. <https://doi.org/10.1177/2158244016681394>
- Austin, L. B., & Shore, B. M. (1994). The use of concept mapping as an instructional strategy in college-level physics. *Scientia Paedagogica Experimentalis--International Journal of Experimental Research in Education, 31*(2), 249-264.
- Austin, L. B., & Shore, B. M. (1995). Using concept mapping for assessment in physics. *Physics Education, 30*(1), 41-45. <https://doi.org/10.1088/0031-9120/30/1/009>
- Chichekian, T., Hua, O., & Shore, B. M. (2013). Inquiring minds in undergraduate instruction: An expression of the teaching-research nexus. In D. J. Salter (Ed.), *Cases on quality teaching practices in higher education* (pp. 146-180). Information Science Reference (IGI Global). <https://doi.org/10.4018/978-1-4666-3661-3.ch010>

- Chichekian, T., Hua, O., & Shore, B. M. (2018). Chemistry professors' perceptions of undergraduate learning. *Canadian Journal for the Scholarship of Teaching and Learning*, 9(1), Article 3, 14 pp. [https://ir.lib.uwo.ca/cjsotl\\_rcacea/vol9/iss1/3](https://ir.lib.uwo.ca/cjsotl_rcacea/vol9/iss1/3)
- Chichekian, T., & Shore, B. M. (2013). Concept maps provide a window onto preservice elementary teachers' knowledge in the teaching and learning of mathematics. *Canadian Journal of Education*, 36(3), 47-71. <http://journals.sfu.ca/cje/index.php/cje-rce/article/view/1542/1598>
- Chichekian, T., & Shore, B. M. (2014). The International Baccalaureate: Contributing to the use of inquiry in higher education teaching and learning. In J. M. Carfora & P. Blessinger (Eds.), *Inquiry-based learning for faculty and institutional development: A conceptual and practical resource for educators* (Vol. 1 in the series, *Innovations in Higher Education Teaching and Learning*, series editor P. Blessinger) (pp. 73-97). Emerald. <https://doi.org/10.1108/S2055-364120140000001006>
- Chichekian, T., & Shore, B. M. (2016). Preservice and practicing teachers' self-efficacy for inquiry-based instruction. *Cogent Education*, 3, Article 1236872. (19 pp). <https://doi.org/10.1080/2331186X.2016.1236872>
- Hua, O., Shore, B. M., & Makarova, E. (2014). Inquiry-based instruction within a community of practice for gifted-ADHD college students. *Gifted Education International*, 30(1), 74-86. <https://doi.org/0.1177/0261429412447709>
- Manconi, L., Aulls, M. W., & Shore, B. M. (2008). Teachers' use and understanding of strategy in inquiry instruction. In B. M. Shore, M. W. Aulls, & M. A. B. Delcourt (Eds.), *Inquiry in education (Vol. II): Overcoming barriers to successful implementation* (pp. 247-270). Routledge (originally Erlbaum).

- Shore, B. M. (1982). Reflections on educating teachers for the gifted. *Gifted International*, 1(1), 119-127. <https://doi.org/10.1080/15332276.1982.11672670>
- Shore, B. M. (1991). Building a solid professional knowledge base in gifted education. *Exceptionality Education Canada*, 1(1), 85-102.  
[https://www.researchgate.net/publication/299302447\\_Building\\_a\\_solid\\_professional\\_knowledge\\_base\\_in\\_gifted\\_education/link/56f45fcc08ae95e8b6d0675f/download](https://www.researchgate.net/publication/299302447_Building_a_solid_professional_knowledge_base_in_gifted_education/link/56f45fcc08ae95e8b6d0675f/download)
- Shore, B. M. (2014). *The graduate advisor handbook: A student-centered approach*. The University of Chicago Press (in the series *Chicago Guides to Academic Life*).  
<https://doi.org/10.7208/chicago/9780226011783.001.0001>
- Shore, B. M., Pinker, S., & Bates, M. (1990). Research as a model for university teaching. *Higher Education*, 19(1), 21-35. <https://doi.org/10.1007/BF00142021>
- Shore, B. M., & Kaizer, C. (2009). The training of teachers for gifted pupils. In D. Eyre (Ed.), *Gifted and talented education: Major themes in education (Vol. I)* (pp. 314-327). Routledge. Reprint of Shore, B. M., & Kaizer, C. (1989). The training of teachers for gifted pupils. *Canadian Journal of Education*, 14(3), 74-87.  
<https://doi.org/10.2307/1495202>
- Syer, C. A., Chichekian, T., Shore, B. M., & Aulls, M. W. (2013). Learning “to do” and learning “about” inquiry at the same time: Different outcomes in valuing the importance of various intellectual tasks in planning, enacting, and evaluating an inquiry curriculum. *Instructional Science*, 41(3), 521-537. <https://doi.org/10.1007/s11251-012-9242-5>
- World Council for Gifted and Talented Children. (2021). *Global principles for professional learning in gifted education*. <https://world-gifted.org/professional-learning-global-principles.pdf> (Report of the Teacher Education Standards Position Paper Committee, N.

Hafenstein (Chair), A. Al-Hroub, R. Cathcart, V. DeOkoro, S. Elzalabany, S. Fodor, S.

Gallagher, S. Güçyeter, A. Hamdan, E. A. Hany, M. Jurišević, M. K. Mhlolo, F.

Mormando, S. Muthusami, C. Phelps, M. J. L. Roberts, Ronksley-Pavia, B. M. Shore, M.

Sutherland, E. van Gervan, M. Yuen, & R. Zorman.)
